# Supplementary material for: Comparative Analysis of Subclassification Systems in Patients with Intermediate-Stage Hepatocellular Carcinoma (Barcelona Clinic Liver Classification B) Receiving Systemic Therapy
Source: MDPI journal article supplement (doi:10.3390/curroncol31010038), 2024-01-19
Supplement: s1 [file s1]

**Supplementary Table 1.** Stratification of overall survival according to the subclassification systems.

| Bolondi system<br>according to AFP | n          | OS, mo (95%CI)   | HR (95%CI)            | p      | HR (95%CI)            | p      | HR (95%CI)           | p      | HR (95%CI)          | p     | HR (95%CI)           | p     |
|------------------------------------|------------|------------------|-----------------------|--------|-----------------------|--------|----------------------|--------|---------------------|-------|----------------------|-------|
| B1 <400                            | 38 (22.2%) | 22.5 (17.3-27.8) | Ref.                  |        |                       |        |                      |        |                     |       |                      |       |
| B1 >400                            | 8 (4.7%)   | 15.2 (0.1-47.9)  | 1.011 (0.392-2.607)   | 0.983  | Ref.                  | -      |                      |        |                     |       |                      |       |
| B2 <400                            | 81 (47.7%) | 15.2 (8.4-21.9)  | 1.712 (1.123-2.610)   | 0.012  | 1.701 (0.686-4.217)   | 0.252  | Ref.                 | -      | -                   |       |                      |       |
| B2 >400                            | 33 (19.3%) | 7.0 (5.5-8.5)    | 3.416 (2.061-5.660)   | <0.001 | 3.410 (1.320-8.808)   | 0.011  | 2.014 (1.324-3.063)  | 0.001  | Ref.                | -     | -                    |       |
| B3 <400                            | 6 (3.5%)   | 6.6 (0.1-16.8)   | 2.893 (1.196-7.000)   | 0.018  | 2.888 (0.876-9.522)   | 0.081  | 1.695 (0.735-3.907)  | 0.216  | 0.885 (0.366-2.140) | 0.787 | Ref.                 | -     |
| B3 >400                            | 5 (2.9%)   | 4.4 (1.9-6.9)    | 11.685 (4.303-31.731) | <0.001 | 11.505 (3.189-41.506) | <0.001 | 6.693 (2.565-17.466) | <0.001 | 2.479 (0.915-6.671) | 0.074 | 2.729 (0.636-11.707) | 0.177 |

AFP: alpha-fetoprotein

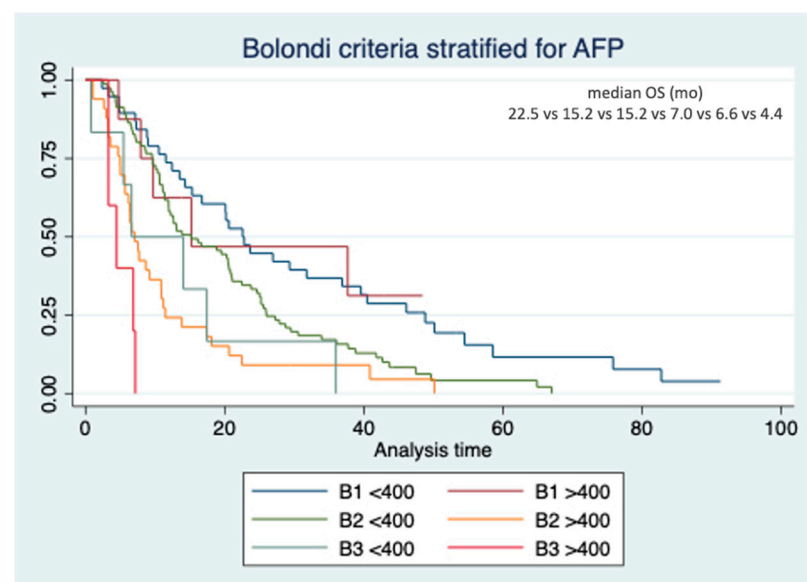

**Supplementary Figure 1.** Kaplan-Meier curves of overall survival according to Bolondi criteria stratified for alpha-fetoprotein.
